# Supplementary material
Source: MDPI journal article supplement (https://www.mdpi.com/2073-4395/11/6/1119)
Supplement: s1 [file s1]

## Supplementary material

**Table S1.** List of locations tested in Europe from 2001 to 2013. Site numbers refer to the location code used during the analysis.

| Site number | Sites                | Country               | Site number | Sites               | Country     |
|-------------|----------------------|-----------------------|-------------|---------------------|-------------|
| 1           | Aberystwyth          | UK (Wales)            | 18          | Malchow             | Germany     |
| 2           | Les Alleuds          | France                | 19          | Merelbeke           | Belgium     |
| 3           | Hof Steimke Asendorf | Germany               | 20          | Montours            | France      |
| 4           | Aston le Walls       | UK                    | 21          | Neuhof              | Germany     |
| 5           | Boelshoj             | Denmark               | 22          | Nort s. E.          | France      |
| 6           | Bornhof              | Germany               | 23          | Orchies             | France      |
| 7           | Druelle              | France                | 24          | Ottersum            | Netherlands |
| 8           | Flaujaques           | France                | 25          | Perugia             | Italy       |
| 9           | Gumpenstein          | Austria               | 26          | Pulling             | Germany     |
| 10          | Hladke Zivotice      | Czechia               | 27          | Radzików            | Poland      |
| 11          | Hohenheim            | Germany               | 28          | Zurich (Reckenholz) | Switzerland |
| 12          | Jevicko              | Czechia               | 29          | Rennes              | France      |
| 13          | Lelystad Barenbrug   | Netherlands           | 30          | Rilland/Swifterband | Netherlands |
| 14          | Lelystad Cebeco      | Netherlands           | 31          | Les Rosiers         | France      |
| 15          | Lodi                 | Italy                 | 32          | Roznov Zubri        | Czechia     |
| 16          | Loughgall            | UK (Northern Ireland) | 33          | Spitalhof           | Germany     |
| 17          | Gross Luesewitz      | Germany               | 34          | Steinach            | Germany     |

**Table S2.** The adopted scoring scale reported by Schubiger et al. [4]. The rating values represent a relative estimate of the leaf area affected by rust.

| SCORE | PHENOTYPE                            |
|-------|--------------------------------------|
| 1     | no rust                              |
| 2     | trace of rust                        |
| 3     | 5 % of the foliage covered with rust |
| 4     | 10% of the foliage covered with rust |

|   |                                                                                                   |
|---|---------------------------------------------------------------------------------------------------|
| 5 | 25 % of the foliage covered with rust; predominantly leaves with scattered pustules               |
| 6 | 40 % of the foliage covered with rust; leaves spotted with many pustules                          |
| 7 | 60 % of the foliage covered with rust; leaves densely covered with areas of rust and few necroses |
| 8 | 75 % of the foliage covered with rust; leaves densely covered with rust and many necrotic leaves  |
| 9 | more than 75 % of the foliage covered with rust; predominantly leaves with necrosis               |

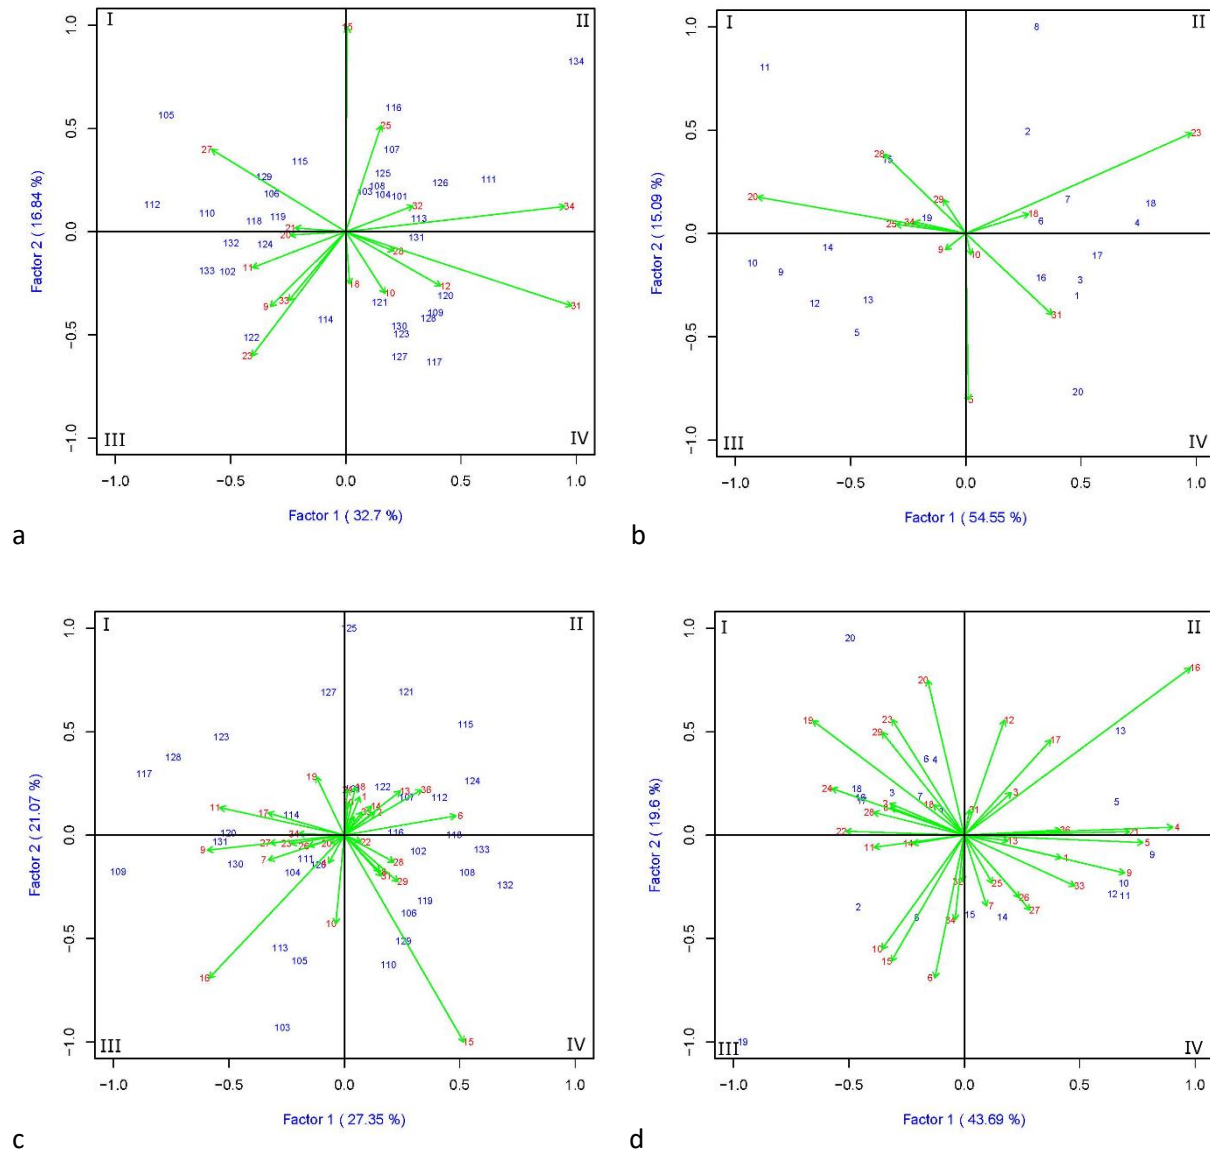

**Figure S1.** AMMI 2 biplot for PGR in a) LP and b) in LM and for PCO c) LP and d) LM. Green arrows refer to environmental vectors, the red numbers represent the locations and the blue numbers represent the varieties. The arrows' length indicates variability in the variation response for that particular environment: the longer the arrow, the higher is the response variability. Only the endpoints of the genotype vectors are represented in the plots. The angle between their vectors assesses the interaction between varieties and environments. Acute angles indicate positive interaction; obtuse angle indicates a negative correlation, and right angle represents no interaction.

**Table S3.** Summary of perennial ryegrass varieties information. Mean of the rust resistance scores across all tested environments; coefficient of variation % (CVar); slope of regression ( $b_i$ ), deviation from regression ( $S^2_{di}$ ) of the perennial ryegrass varieties

| VARIETIES |      |        | PCO-LP |       |       |            |      | PGR-LP |       |       |            |      |
|-----------|------|--------|--------|-------|-------|------------|------|--------|-------|-------|------------|------|
| Name      | Code | Ploidy | Mean   | CVar  | $b_i$ | $S^2_{di}$ | ASV  | Mean   | CVar  | $b_i$ | $S^2_{di}$ | ASV  |
| Aberdart  | 101  | 2x     | 5.6    | 27.45 | 1.22  | -0.07      | 0,25 | 6.6    | 14.79 | 1.04  | -0.11      | 0,53 |
| Arabella  | 102  | 2x     | 5.7    | 22.24 | 1.02  | -0.17      | 0,56 | 5.5    | 18.04 | 1.04  | -0.09      | 1,07 |
| Aristo    | 103  | 2x     | 5.1    | 32.88 | 1.21  | 0.44       | 1,32 | 6.4    | 13.28 | 0.96  | -0.25      | 0,28 |
| Aubisque  | 104  | 4x     | 6.5    | 17.83 | 0.89  | -0.11      | 0,45 | 7.2    | 10.50 | 0.85  | -0.27      | 0,38 |
| Aurora    | 105  | 2x     | 3.1    | 43.47 | 0.75  | 0.72       | 0,87 | 4.3    | 34.24 | 1.31  | 0.70       | 1,61 |
| Barnhem   | 106  | 2x     | 6.1    | 21.78 | 1.03  | -0.01      | 0,69 | 5.8    | 16.44 | 1.01  | -0.12      | 0,68 |
| Bocage    | 107  | 4x     | 7.1    | 14.20 | 0.78  | -0.17      | 0,52 | 7.4    | 11.15 | 0.92  | -0.23      | 0,60 |
| Carrera   | 108  | 2x     | 6.8    | 20.00 | 1.06  | -0.02      | 0,94 | 7.0    | 10.73 | 0.78  | -0.20      | 0,37 |
| Condesa   | 109  | 4x     | 4.4    | 35.23 | 1.10  | 0.47       | 1,69 | 6.6    | 18.48 | 1.36  | -0.10      | 0,95 |
| Corbet    | 110  | 2x     | 5.8    | 24.72 | 1.12  | 0.04       | 0,88 | 5.2    | 19.33 | 0.95  | 0.08       | 1,24 |
| Elgon     | 111  | 4x     | 6.1    | 24.19 | 1.18  | -0.05      | 0,34 | 7.1    | 11.92 | 0.81  | -0.06      | 1,29 |
| Fennema   | 112  | 2x     | 5.8    | 22.62 | 1.01  | -0.03      | 0,75 | 5.3    | 22.21 | 1.18  | 0.15       | 1,68 |
| Foxtrot   | 113  | 2x     | 5.2    | 28.80 | 1.18  | -0.04      | 0,85 | 6.4    | 16.55 | 1.18  | -0.16      | 0,67 |
| Gladio    | 114  | 2x     | 5.3    | 26.90 | 1.17  | -0.20      | 0,42 | 6.2    | 16.85 | 1.15  | -0.14      | 0,49 |
| Guru      | 115  | 2x     | 5.4    | 30.06 | 1.04  | 0.83       | 1,09 | 6.0    | 15.04 | 0.85  | 0.00       | 0,56 |
| Gwendal   | 116  | 4x     | 7.2    | 16.78 | 0.91  | -0.02      | 0,36 | 7.6    | 10.06 | 0.79  | -0.18      | 0,77 |
| Helmer    | 117  | 4x     | 4.9    | 28.70 | 0.98  | 0.35       | 1,54 | 6.8    | 14.71 | 1.01  | 0.00       | 0,99 |
| Heraut    | 118  | 2x     | 6.3    | 20.35 | 0.99  | -0.06      | 0,82 | 5.6    | 17.66 | 1.06  | -0.10      | 0,83 |
| Kells     | 119  | 2x     | 6.1    | 22.27 | 1.08  | -0.06      | 0,73 | 5.7    | 16.69 | 1.05  | -0.20      | 0,59 |
| Kentaur   | 120  | 4x     | 5.8    | 22.48 | 1.02  | -0.09      | 0,86 | 7.1    | 12.27 | 0.95  | -0.19      | 0,92 |
| Lacerta   | 121  | 4x     | 6.9    | 14.31 | 0.60  | 0.15       | 1,02 | 7.1    | 11.34 | 0.84  | -0.16      | 0,43 |
| Lipresso  | 122  | 2x     | 4.7    | 26.95 | 0.94  | 0.04       | 0,42 | 5.0    | 21.68 | 1.07  | 0.06       | 1,01 |
| Litempo   | 123  | 4x     | 5.4    | 24.40 | 1.00  | 0.04       | 1,11 | 6.7    | 15.01 | 1.13  | -0.18      | 0,70 |
| Option    | 124  | 2x     | 6.4    | 19.07 | 0.93  | -0.02      | 1,02 | 6.0    | 15.72 | 1.01  | -0.11      | 0,75 |
| Orval     | 125  | 2x     | 6.4    | 25.64 | 1.10  | 0.72       | 1,28 | 7.0    | 12.10 | 0.85  | -0.09      | 0,45 |
| Pastoral  | 126  | 4x     | 6.8    | 17.00 | 0.92  | -0.16      | 0,26 | 7.5    | 12.35 | 1.02  | -0.18      | 0,89 |
| Roy       | 127  | 4x     | 6.0    | 22.20 | 0.97  | 0.12       | 0,90 | 7.2    | 12.29 | 0.91  | -0.11      | 0,79 |
| Sirocco   | 128  | 4x     | 5.0    | 27.25 | 0.95  | 0.27       | 1,37 | 6.5    | 17.51 | 1.28  | -0.16      | 0,87 |
| Sponsor   | 129  | 2x     | 5.8    | 23.07 | 1.04  | -0.08      | 0,80 | 5.7    | 13.58 | 0.80  | -0.16      | 0,80 |
| Terry     | 130  | 4x     | 5.6    | 21.96 | 0.97  | -0.10      | 0,82 | 7.1    | 13.14 | 1.02  | -0.18      | 0,64 |
| Tivoli    | 131  | 4x     | 5.2    | 25.52 | 1.01  | 0.04       | 0,92 | 7.1    | 12.17 | 0.98  | -0.24      | 0,63 |
| Vincent   | 132  | 2x     | 6.5    | 19.52 | 0.94  | 0.06       | 1,24 | 5.7    | 14.59 | 0.83  | -0.10      | 1,05 |
| Weigra    | 133  | 2x     | 5.8    | 21.09 | 0.89  | 0.05       | 1,03 | 5.6    | 18.88 | 1.14  | -0.08      | 1,24 |

|                |     |    |            |   |   |   |            |       |      |      |      |
|----------------|-----|----|------------|---|---|---|------------|-------|------|------|------|
| Maja           | 134 | 4x | -          | - | - | - | 7.4        | 16.27 | 0.88 | 0.66 | 2,22 |
| <b>AVERAGE</b> |     |    | <b>5.8</b> |   |   |   | <b>6.4</b> |       |      |      |      |

**Table S4.** Summary of Italian and hybrid ryegrass varieties information. Mean of the rust resistance scores across all tested environments; coefficient of variation % (CVar); slope of regression ( $b_i$ ), deviation from regression ( $S^2_{di}$ ) of Italian and boucheanum (Lb) varieties.

| VARIETIES      |      |        | PCO-LM     |       |       |            |      | PGR-LM     |       |       |            |      |
|----------------|------|--------|------------|-------|-------|------------|------|------------|-------|-------|------------|------|
| Name           | code | Ploidy | Mean       | CVar  | $b_i$ | $S^2_{di}$ | ASV  | Mean       | CVar  | $b_i$ | $S^2_{di}$ | ASV  |
| Aberexcel (Lb) | 1    | 4x     | 6.8        | 13.92 | 0.83  | -          | 0.73 | 7.2        | 18.13 | 0.81  | 0.33       | 2,03 |
| Barprisma      | 2    | 2x     | 6.6        | 16.94 | 1.00  | -          | 1.50 | 6.8        | 18.35 | 0.81  | 0.14       | 1,26 |
| Bolero         | 3    | 4x     | 7.0        | 11.94 | 0.80  | -          | 0.97 | 7.7        | 13.06 | 0.67  | -          | 2,08 |
| Caballo        | 4    | 4x     | 7.2        | 12.66 | 0.82  | -          | 1.13 | 7.9        | 10.29 | 0.48  | 0.04       | 3,08 |
| Danergo        | 5    | 4x     | 5.0        | 28.62 | 1.33  | 0.03       | 2.61 | 7.3        | 26.59 | 1.36  | 0.06       | 2,04 |
| Domino         | 6    | 4x     | 7.3        | 11.53 | 0.77  | -          | 0.82 | 7.8        | 13.14 | 0.71  | -          | 1,37 |
| Ellire         | 7    | 4x     | 6.5        | 16.79 | 0.98  | -          | 0.52 | 7.4        | 15.18 | 0.73  | 0.10       | 1,83 |
| Fastyl         | 8    | 2x     | 6.4        | 17.76 | 1.04  | -          | 1.35 | 6.9        | 16.98 | 0.65  | 0.42       | 1,74 |
| Gordo          | 9    | 2x     | 3.9        | 40.15 | 1.39  | 0.25       | 3.10 | 6.2        | 34.96 | 1.54  | 0.12       | 3,31 |
| Gumpens. (Lb)  | 10   | 2x     | 3.8        | 38.24 | 1.32  | 0.06       | 2.06 | 6.3        | 37.54 | 1.66  | 0.20       | 3,82 |
| Lema           | 11   | 2x     | 3.9        | 34.44 | 1.21  | 0.11       | 2.18 | 6.0        | 38.02 | 1.48  | 0.89       | 3,73 |
| Ligrande       | 12   | 2x     | 4.2        | 34.31 | 1.36  | -          | 2.22 | 6.1        | 33.65 | 1.43  | 0.23       | 2,73 |
| Lolita         | 13   | 4x     | 4.8        | 29.11 | 1.20  | 0.21       | 2.19 | 7.2        | 26.56 | 1.35  | -          | 1,80 |
| Meryl          | 14   | 2x     | 5.5        | 21.84 | 1.13  | -          | 0.78 | 6.5        | 30.72 | 1.40  | 0.15       | 2,51 |
| Pirol (Lb)     | 15   | 2x     | 5.7        | 22.73 | 1.26  | -          | 0.66 | 6.3        | 28.93 | 1.28  | 0.07       | 1,48 |
| Tarandus       | 16   | 4x     | 7.3        | 11.27 | 0.74  | -          | 1.38 | 7.5        | 17.30 | 0.87  | 0.08       | 1,38 |
| Tonyl          | 17   | 4x     | 7.0        | 13.72 | 0.87  | -          | 1.37 | 7.7        | 13.94 | 0.68  | 0.10       | 2,37 |
| Zorro          | 18   | 4x     | 7.2        | 12.79 | 0.82  | -          | 1.34 | 7.9        | 9.71  | 0.44  | 0.04       | 3,34 |
| Crema          | 19   | 2x     | 5.1        | 24.26 | 0.66  | 0.82       | 3.31 | 5.2        | 31.58 | 0.90  | 1.12       | 0,74 |
| Gosia (Lb)     | 20   | 4x     | 7.2        | 12.63 | 0.47  | 0.29       | 2.20 | 7.0        | 19.85 | 0.76  | 0.77       | 2,21 |
| <b>AVERAGE</b> |      |        | <b>5.9</b> |       |       |            |      | <b>6.9</b> |       |       |            |      |

**Table S5.** Summary of the phenotypic variation per location across years. Average of disease score (Average), standard deviation (Sd), min and max, and coefficient of variation (CVar) of each location per each of the tested years compared to the Brier score (BR) and standard deviation (Sd).

| Location  | Year | Min | Max | PCO-LP  |      |      | BR (Sd)      |
|-----------|------|-----|-----|---------|------|------|--------------|
|           |      |     |     | Average | Sd   | CVar |              |
| <b>3</b>  | 2001 | 3   | 8   | 6,42    | 1,03 | 0,16 | 0,48 (0.002) |
| <b>3</b>  | 2004 | 2   | 9   | 6,90    | 1,22 | 0,18 | 0,48 (0.002) |
| <b>3</b>  | 2007 | 3   | 8   | 5,29    | 1,25 | 0,24 | 0,48 (0.002) |
| <b>3</b>  | 2010 | 3   | 8   | 5,29    | 1,34 | 0,25 | 0,48 (0.002) |
| <b>3</b>  | 2013 | 2   | 8   | 5,50    | 1,35 | 0,25 | 0,48 (0.002) |
| <b>4</b>  | 2004 | 3   | 8   | 6,12    | 1,02 | 0,17 | 0,30 (0.005) |
| <b>4</b>  | 2010 | 5   | 9   | 6,96    | 0,78 | 0,11 | 0,30 (0.005) |
| <b>4</b>  | 2013 | 5   | 9   | 7,15    | 0,68 | 0,10 | 0,30 (0.005) |
| <b>6</b>  | 2001 | 1   | 8   | 5,33    | 1,81 | 0,34 | 0,47 (0.004) |
| <b>6</b>  | 2004 | 2   | 8   | 5,58    | 1,70 | 0,30 | 0,47 (0.004) |
| <b>6</b>  | 2007 | 3   | 9   | 6,46    | 1,53 | 0,24 | 0,47 (0.004) |
| <b>6</b>  | 2010 | 1   | 8   | 3,77    | 2,00 | 0,53 | 0,47 (0.004) |
| <b>6</b>  | 2013 | 1   | 8   | 3,46    | 1,55 | 0,45 | 0,47 (0.004) |
| <b>7</b>  | 2007 | 4   | 9   | 7,10    | 0,77 | 0,11 | 0,42 (0.004) |
| <b>7</b>  | 2010 | 4   | 9   | 6,32    | 1,02 | 0,16 | 0,42 (0.004) |
| <b>7</b>  | 2013 | 4   | 9   | 6,88    | 0,97 | 0,14 | 0,42 (0.004) |
| <b>13</b> | 2001 | 2   | 8   | 5,92    | 1,52 | 0,26 | 0,45 (0.003) |
| <b>13</b> | 2004 | 4   | 8   | 6,52    | 0,90 | 0,14 | 0,45 (0.003) |
| <b>13</b> | 2010 | 3   | 8   | 5,01    | 1,26 | 0,25 | 0,45 (0.003) |
| <b>13</b> | 2013 | 1   | 8   | 5,35    | 1,65 | 0,31 | 0,45 (0.003) |
| <b>14</b> | 2001 | 1   | 8   | 5,78    | 1,63 | 0,28 | 0,45 (0.007) |
| <b>14</b> | 2004 | 3   | 8   | 6,48    | 1,00 | 0,15 | 0,45 (0.007) |
| <b>14</b> | 2007 | 2   | 9   | 6,24    | 1,27 | 0,20 | 0,45 (0.007) |
| <b>15</b> | 2004 | 1   | 9   | 5,30    | 2,70 | 0,51 | 0,45 (0.092) |
| <b>15</b> | 2007 | 1   | 9   | 7,79    | 2,25 | 0,29 | 0,45 (0.092) |
| <b>15</b> | 2010 | 2   | 9   | 6,98    | 1,82 | 0,26 | 0,45 (0.092) |
| <b>17</b> | 2001 | 1   | 7   | 4,09    | 1,23 | 0,30 | 0,43 (0.004) |
| <b>17</b> | 2004 | 1   | 7   | 2,92    | 1,02 | 0,35 | 0,43 (0.004) |
| <b>17</b> | 2007 | 1   | 5   | 2,78    | 0,99 | 0,36 | 0,43 (0.004) |
| <b>18</b> | 2001 | 2   | 9   | 6,24    | 1,57 | 0,25 | 0,47 (0.001) |
| <b>18</b> | 2004 | 3   | 8   | 6,42    | 1,20 | 0,19 | 0,47 (0.001) |
| <b>18</b> | 2007 | 2   | 9   | 6,53    | 1,34 | 0,21 | 0,47 (0.001) |
| <b>18</b> | 2010 | 3   | 9   | 6,66    | 1,34 | 0,20 | 0,47 (0.001) |
| <b>18</b> | 2013 | 3   | 9   | 5,71    | 1,63 | 0,28 | 0,47 (0.001) |

|    |      |   |   |      |      |      |              |
|----|------|---|---|------|------|------|--------------|
| 19 | 2001 | 1 | 8 | 4,26 | 1,66 | 0,39 | 0,46 (0.002) |
| 19 | 2004 | 1 | 9 | 6,23 | 1,68 | 0,27 | 0,46 (0.002) |
| 19 | 2007 | 1 | 9 | 4,99 | 1,74 | 0,35 | 0,46 (0.002) |
| 19 | 2010 | 1 | 9 | 5,43 | 1,53 | 0,28 | 0,46 (0.002) |
| 19 | 2013 | 2 | 8 | 5,51 | 1,34 | 0,24 | 0,46 (0.002) |
| 20 | 2001 | 1 | 9 | 5,57 | 1,59 | 0,29 | 0,47 (0.004) |
| 20 | 2004 | 2 | 9 | 5,82 | 1,50 | 0,26 | 0,47 (0.004) |
| 20 | 2007 | 1 | 8 | 5,50 | 1,77 | 0,32 | 0,47 (0.004) |
| 20 | 2010 | 3 | 9 | 6,52 | 1,12 | 0,17 | 0,47 (0.004) |
| 20 | 2013 | 2 | 9 | 5,85 | 1,59 | 0,27 | 0,47 (0.004) |
| 23 | 2001 | 1 | 8 | 4,76 | 1,59 | 0,33 | 0,44 (0.003) |
| 23 | 2004 | 4 | 8 | 5,31 | 0,92 | 0,17 | 0,44 (0.003) |
| 23 | 2007 | 5 | 9 | 6,88 | 0,91 | 0,13 | 0,44 (0.003) |
| 24 | 2001 | 1 | 9 | 6,86 | 1,64 | 0,24 | 0,46 (0.003) |
| 24 | 2004 | 1 | 9 | 5,23 | 1,64 | 0,31 | 0,46 (0.003) |
| 24 | 2007 | 2 | 8 | 6,31 | 1,46 | 0,23 | 0,46 (0.003) |
| 24 | 2010 | 2 | 9 | 7,52 | 1,60 | 0,21 | 0,46 (0.003) |
| 24 | 2013 | 2 | 8 | 4,57 | 1,22 | 0,27 | 0,46 (0.003) |
| 26 | 2001 | 1 | 9 | 8,11 | 1,35 | 0,17 | 0,44 (0.011) |
| 26 | 2007 | 4 | 8 | 7,27 | 0,87 | 0,12 | 0,44 (0.011) |
| 26 | 2010 | 4 | 9 | 7,96 | 1,08 | 0,14 | 0,44 (0.011) |
| 26 | 2013 | 4 | 8 | 6,30 | 0,93 | 0,15 | 0,44 (0.011) |
| 28 | 2001 | 1 | 9 | 6,14 | 1,88 | 0,31 | 0,46 (0.002) |
| 28 | 2004 | 3 | 9 | 7,75 | 1,28 | 0,17 | 0,46 (0.002) |
| 28 | 2007 | 1 | 9 | 6,48 | 1,65 | 0,25 | 0,46 (0.002) |
| 28 | 2010 | 1 | 9 | 7,02 | 1,79 | 0,25 | 0,46 (0.002) |
| 28 | 2013 | 1 | 9 | 6,06 | 1,65 | 0,27 | 0,46 (0.002) |
| 34 | 2001 | 2 | 9 | 4,93 | 1,43 | 0,29 | 0,48 (0.005) |
| 34 | 2004 | 3 | 9 | 7,02 | 1,18 | 0,17 | 0,48 (0.005) |
| 34 | 2007 | 2 | 9 | 6,21 | 1,61 | 0,26 | 0,48 (0.005) |
| 34 | 2013 | 4 | 8 | 5,93 | 0,92 | 0,16 | 0,48 (0.005) |

#### PCO\_LM

| Locatio<br>n | Year | Min | Max | Average | Sd    | CVar  | BR (Sd)      |
|--------------|------|-----|-----|---------|-------|-------|--------------|
| 3            | 2004 | 2   | 9   | 7,658   | 1,381 | 0,180 | 0,45 (0.005) |
| 3            | 2007 | 2   | 8   | 5,588   | 1,940 | 0,347 | 0,45 (0.005) |
| 3            | 2010 | 3   | 9   | 6,713   | 1,460 | 0,217 | 0,45 (0.005) |
| 3            | 2013 | 4   | 9   | 6,900   | 1,374 | 0,199 | 0,45 (0.005) |
| 4            | 2004 | 3   | 9   | 6,395   | 1,479 | 0,231 | 0,42 (0.013) |

|    |      |   |   |       |       |       |              |
|----|------|---|---|-------|-------|-------|--------------|
| 4  | 2010 | 5 | 9 | 7,675 | 1,028 | 0,134 | 0,42 (0.013) |
| 4  | 2013 | 5 | 9 | 7,413 | 0,977 | 0,132 | 0,42 (0.013) |
| 6  | 2001 | 2 | 8 | 6,486 | 1,547 | 0,239 | 0,47 (0.004) |
| 6  | 2004 | 1 | 8 | 5,461 | 1,822 | 0,334 | 0,47 (0.004) |
| 6  | 2007 | 3 | 9 | 6,863 | 1,613 | 0,235 | 0,47 (0.004) |
| 6  | 2010 | 2 | 9 | 7,613 | 1,673 | 0,220 | 0,47 (0.004) |
| 6  | 2013 | 1 | 8 | 5,838 | 1,912 | 0,328 | 0,47 (0.004) |
| 7  | 2001 | 4 | 7 | 6,194 | 1,002 | 0,162 | 0,45 (0.007) |
| 7  | 2007 | 3 | 8 | 6,213 | 1,177 | 0,189 | 0,45 (0.007) |
| 7  | 2010 | 3 | 7 | 4,663 | 1,201 | 0,258 | 0,45 (0.007) |
| 7  | 2013 | 3 | 8 | 5,575 | 1,385 | 0,248 | 0,45 (0.007) |
| 9  | 2004 | 5 | 8 | 6,697 | 0,938 | 0,140 | 0,44 (0.006) |
| 9  | 2007 | 4 | 9 | 7,725 | 1,031 | 0,133 | 0,44 (0.006) |
| 9  | 2010 | 7 | 9 | 7,863 | 0,791 | 0,101 | 0,44 (0.006) |
| 11 | 2001 | 3 | 9 | 6,819 | 2,078 | 0,305 | 0,43 (0.01)  |
| 11 | 2004 | 1 | 9 | 5,276 | 2,359 | 0,447 | 0,43 (0.01)  |
| 11 | 2007 | 3 | 7 | 5,363 | 1,334 | 0,249 | 0,43 (0.01)  |
| 13 | 2001 | 2 | 8 | 6,167 | 2,042 | 0,331 | 0,45 (0.01)  |
| 13 | 2004 | 4 | 9 | 7,487 | 1,291 | 0,172 | 0,45 (0.01)  |
| 13 | 2010 | 4 | 9 | 7,638 | 1,486 | 0,195 | 0,45 (0.01)  |
| 13 | 2013 | 4 | 9 | 6,650 | 1,148 | 0,173 | 0,45 (0.01)  |
| 15 | 2001 | 3 | 8 | 5,750 | 1,480 | 0,257 | 0,47 (0.005) |
| 15 | 2004 | 1 | 9 | 5,737 | 2,211 | 0,385 | 0,47 (0.005) |
| 15 | 2007 | 1 | 9 | 5,225 | 2,658 | 0,509 | 0,47 (0.005) |
| 15 | 2010 | 1 | 8 | 4,688 | 1,718 | 0,367 | 0,47 (0.005) |
| 17 | 2001 | 4 | 9 | 6,292 | 1,131 | 0,180 | 0,45 (0.009) |
| 17 | 2004 | 1 | 7 | 3,974 | 1,505 | 0,379 | 0,45 (0.009) |
| 17 | 2007 | 1 | 7 | 3,363 | 1,686 | 0,501 | 0,45 (0.009) |
| 18 | 2001 | 4 | 9 | 7,306 | 1,460 | 0,200 | 0,44 (0.011) |
| 18 | 2004 | 3 | 9 | 6,605 | 1,617 | 0,245 | 0,44 (0.011) |
| 18 | 2007 | 2 | 9 | 5,900 | 1,978 | 0,335 | 0,44 (0.011) |
| 19 | 2001 | 1 | 8 | 5,347 | 2,150 | 0,402 | 0,46 (0.002) |
| 19 | 2004 | 1 | 8 | 5,724 | 1,964 | 0,343 | 0,46 (0.002) |
| 19 | 2007 | 1 | 9 | 4,575 | 2,704 | 0,591 | 0,46 (0.002) |
| 19 | 2010 | 1 | 9 | 5,913 | 2,486 | 0,421 | 0,46 (0.002) |
| 19 | 2013 | 3 | 9 | 5,950 | 1,525 | 0,256 | 0,46 (0.002) |
| 20 | 2001 | 2 | 9 | 5,875 | 1,846 | 0,314 | 0,47 (0.004) |
| 20 | 2004 | 1 | 7 | 3,684 | 2,041 | 0,554 | 0,47 (0.004) |
| 20 | 2007 | 2 | 9 | 6,400 | 2,259 | 0,353 | 0,47 (0.004) |
| 20 | 2010 | 3 | 9 | 6,750 | 1,978 | 0,293 | 0,47 (0.004) |

|           |      |   |    |       |       |       |              |
|-----------|------|---|----|-------|-------|-------|--------------|
| <b>20</b> | 2013 | 2 | 9  | 5,738 | 1,734 | 0,302 | 0,47 (0.004) |
| <b>23</b> | 2001 | 2 | 8  | 5,278 | 1,713 | 0,325 | 0,47 (0.009) |
| <b>23</b> | 2004 | 1 | 8  | 4,461 | 2,375 | 0,532 | 0,47 (0.009) |
| <b>23</b> | 2007 | 2 | 8  | 4,750 | 1,818 | 0,383 | 0,47 (0.009) |
| <b>25</b> | 2001 | 3 | 9  | 5,625 | 1,505 | 0,268 | 0,46 (0.004) |
| <b>25</b> | 2004 | 1 | 7  | 4,763 | 1,743 | 0,366 | 0,46 (0.004) |
| <b>25</b> | 2007 | 4 | 8  | 6,075 | 0,965 | 0,159 | 0,46 (0.004) |
| <b>25</b> | 2010 | 3 | 10 | 6,763 | 1,193 | 0,176 | 0,46 (0.004) |
| <b>25</b> | 2013 | 4 | 9  | 6,700 | 1,216 | 0,181 | 0,46 (0.004) |
| <b>26</b> | 2001 | 3 | 9  | 7,153 | 1,469 | 0,205 | 0,42 (0.006) |
| <b>26</b> | 2007 | 6 | 9  | 7,500 | 0,871 | 0,116 | 0,42 (0.006) |
| <b>26</b> | 2010 | 4 | 9  | 7,775 | 1,283 | 0,165 | 0,42 (0.006) |
| <b>26</b> | 2013 | 4 | 8  | 5,950 | 1,211 | 0,203 | 0,42 (0.006) |
| <b>27</b> | 2004 | 3 | 7  | 5,092 | 1,416 | 0,278 | 0,43 (0.006) |
| <b>27</b> | 2007 | 3 | 8  | 5,950 | 1,349 | 0,227 | 0,43 (0.006) |
| <b>27</b> | 2010 | 4 | 8  | 6,013 | 0,934 | 0,155 | 0,43 (0.006) |
| <b>27</b> | 2013 | 3 | 7  | 5,550 | 1,030 | 0,186 | 0,43 (0.006) |
| <b>28</b> | 2001 | 1 | 9  | 5,194 | 2,281 | 0,439 | 0,46 (0.002) |
| <b>28</b> | 2004 | 1 | 9  | 6,224 | 1,887 | 0,303 | 0,46 (0.002) |
| <b>28</b> | 2007 | 3 | 9  | 7     | 1,669 | 0,238 | 0,46 (0.002) |
| <b>28</b> | 2010 | 3 | 9  | 7,575 | 1,629 | 0,215 | 0,46 (0.002) |
| <b>28</b> | 2013 | 1 | 7  | 4,125 | 1,945 | 0,471 | 0,46 (0.002) |
| <b>31</b> | 2004 | 3 | 8  | 5,434 | 1,247 | 0,230 | 0,48 (0.005) |
| <b>31</b> | 2007 | 2 | 8  | 5,263 | 1,597 | 0,303 | 0,48 (0.005) |
| <b>31</b> | 2010 | 3 | 9  | 6,513 | 1,509 | 0,232 | 0,48 (0.005) |
| <b>31</b> | 2013 | 1 | 9  | 5,925 | 2,305 | 0,389 | 0,48 (0.005) |

| PGR-LP    |      |     |     |         |       |       |              |
|-----------|------|-----|-----|---------|-------|-------|--------------|
| Location  | Year | Min | Max | Average | Sd    | CVar  | BR (Sd)      |
| <b>10</b> | 2001 | 2   | 8   | 6,485   | 1,475 | 0,227 | 0,44 (0.004) |
| <b>10</b> | 2004 | 1   | 8   | 5,326   | 1,220 | 0,229 | 0,44 (0.004) |
| <b>10</b> | 2007 | 3   | 8   | 5,529   | 1,108 | 0,200 | 0,44 (0.004) |
| <b>10</b> | 2013 | 3   | 7   | 4,353   | 1,072 | 0,246 | 0,44 (0.004) |
| <b>15</b> | 2001 | 2   | 8   | 5,705   | 1,445 | 0,253 | 0,46 (0.003) |
| <b>15</b> | 2004 | 1   | 9   | 6,500   | 1,967 | 0,303 | 0,46 (0.003) |
| <b>15</b> | 2007 | 3   | 9   | 7,449   | 1,429 | 0,192 | 0,46 (0.003) |
| <b>18</b> | 2001 | 2   | 9   | 7,212   | 1,508 | 0,209 | 0,44 (0.008) |
| <b>18</b> | 2004 | 6   | 9   | 7,462   | 0,659 | 0,088 | 0,44 (0.008) |
| <b>18</b> | 2007 | 4   | 9   | 6,941   | 1,052 | 0,152 | 0,44 (0.008) |



|           |      |   |   |       |       |       |              |
|-----------|------|---|---|-------|-------|-------|--------------|
| <b>18</b> | 2013 | 2 | 9 | 7,346 | 1,335 | 0,182 | 0,44 (0.008) |
| <b>20</b> | 2001 | 5 | 9 | 7,386 | 1,282 | 0,174 | 0,47 (0.001) |
| <b>20</b> | 2004 | 4 | 9 | 7,614 | 1,276 | 0,168 | 0,47 (0.001) |
| <b>20</b> | 2007 | 5 | 9 | 7,956 | 1,010 | 0,127 | 0,47 (0.001) |
| <b>20</b> | 2010 | 3 | 8 | 6,426 | 1,165 | 0,181 | 0,47 (0.001) |
| <b>20</b> | 2013 | 4 | 9 | 6,647 | 1,244 | 0,187 | 0,47 (0.001) |
| <b>25</b> | 2001 | 2 | 9 | 4,833 | 1,494 | 0,309 | 0,43 (0.003) |
| <b>25</b> | 2004 | 2 | 7 | 5,182 | 1,104 | 0,213 | 0,43 (0.003) |
| <b>25</b> | 2007 | 5 | 9 | 7,221 | 0,971 | 0,135 | 0,43 (0.003) |
| <b>27</b> | 2004 | 1 | 8 | 4,621 | 1,269 | 0,275 | 0,45 (0.014) |
| <b>27</b> | 2007 | 3 | 8 | 5,581 | 1,086 | 0,195 | 0,45 (0.014) |
| <b>27</b> | 2013 | 3 | 7 | 5,721 | 1,031 | 0,180 | 0,45 (0.014) |
| <b>28</b> | 2004 | 2 | 9 | 6,485 | 1,784 | 0,275 | 0,45 (0.009) |
| <b>28</b> | 2007 | 4 | 9 | 7,676 | 1,135 | 0,148 | 0,45 (0.009) |
| <b>28</b> | 2010 | 5 | 7 | 6,654 | 0,703 | 0,106 | 0,45 (0.009) |
| <b>32</b> | 2004 | 5 | 9 | 7,038 | 0,936 | 0,133 | 0,44 (0.002) |
| <b>32</b> | 2007 | 4 | 9 | 7,346 | 1,330 | 0,181 | 0,44 (0.002) |
| <b>32</b> | 2010 | 4 | 9 | 7,787 | 1,319 | 0,169 | 0,44 (0.002) |
| <b>32</b> | 2013 | 2 | 8 | 5,772 | 1,743 | 0,302 | 0,44 (0.002) |

#### PGR-LM

| <b>Locatio<br/>n</b> | <b>Year</b> | <b>Min</b> | <b>Max</b> | <b>Average</b> | <b>Sd</b> | <b>CVar</b> | <b>BR (Sd)</b> |
|----------------------|-------------|------------|------------|----------------|-----------|-------------|----------------|
| <b>10</b>            | 2004        | 3          | 8          | 5,487          | 1,260     | 0,230       | 0.42 (0.006)   |
| <b>10</b>            | 2007        | 5          | 8          | 6,275          | 0,693     | 0,110       | 0.42 (0.006)   |
| <b>10</b>            | 2013        | 3          | 8          | 5,713          | 1,486     | 0,260       | 0.42 (0.006)   |

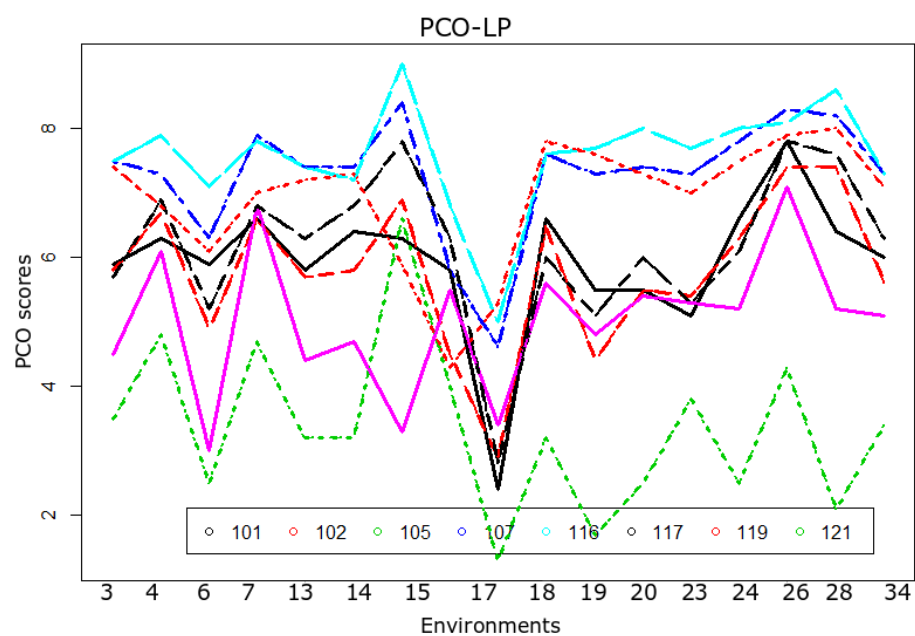

**Figure S2.** Response variability across environments. Scoring levels (y-axis) of eight perennial ryegrass varieties to crown rust in different environments (x-axis). Colors of the lines refer to the varieties.
